# Supplementary material
Source: PubMed Central journal article supplement (PMC6664183)
Supplement: supp_RA118.007123_142529_3_supp_331839_prft9f.pdf [file supp_RA118.007123_142529_3_supp_331839_prft9f.pdf]

TcUBP1 induces up-regulation of a surface glycoprotein RNA regulon and promotes infectivity of the human parasite *Trypanosoma cruzi*

**Karina B. Sabalette<sup>1</sup>, María Albertina Romaniuk<sup>1</sup>, Griselda Noé<sup>1</sup>, Alejandro Cassola<sup>1</sup>,  
Vanina A. Campo<sup>1\*</sup>, Javier G. De Gaudenzi<sup>1\*</sup>**

From the <sup>1</sup>Instituto de Investigaciones Biotecnológicas, Universidad Nacional de San Martín (UNSAM)-Consejo Nacional de Investigaciones Científicas y Técnicas (CONICET). Campus Miguelete, Av. 25 de Mayo y Francia, 1650 San Martín, Buenos Aires, Argentina.

Running title: *Coordinated regulation of multiple mRNAs in T. cruzi*

\*To whom correspondence should be addressed: Javier G. De Gaudenzi; [jdegaudenzi@iib.unsam.edu.ar](mailto:jdegaudenzi@iib.unsam.edu.ar) or Vanina A. Campo; [vcampo@iibintech.com.ar](mailto:vcampo@iibintech.com.ar).

---

## SUPPORTING INFORMATION

### **Material included:**

- Figure S1
- Figure S2
- Figure S3
- Figure S4
- Figure S5
- Figure S6
- Table S1
- Table S2
- Supplemental File 1
- Supplemental File 2

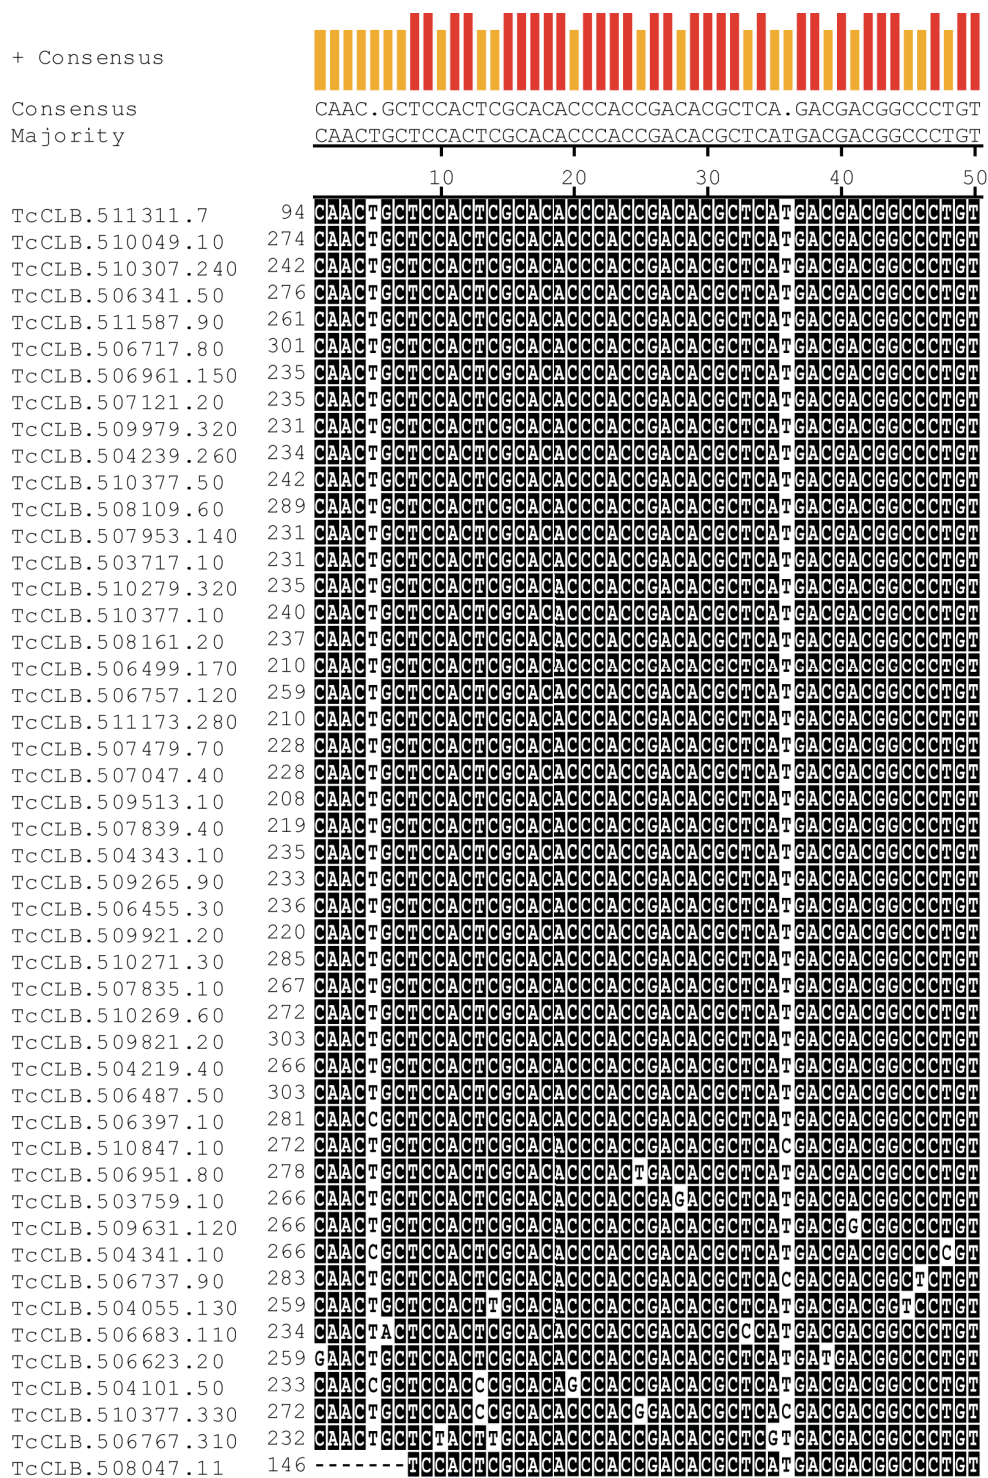

Consensus: When 96% (46) match the residue, otherwise show '.'.

Figure S1. **Multiple sequence alignment of SGPm.** Comparison of 48 short sequence motifs obtained from BLASTN searches likely to be present at the 3'-UTR of some large gene family members. Systematic gene names are shown at the left. The numbers in the sequences indicate the position of SGPm within the 3'-UTR (distances from stop codon). Shade with solid black indicates residues that match the consensus exactly.

## Distribution of *cis*-elements

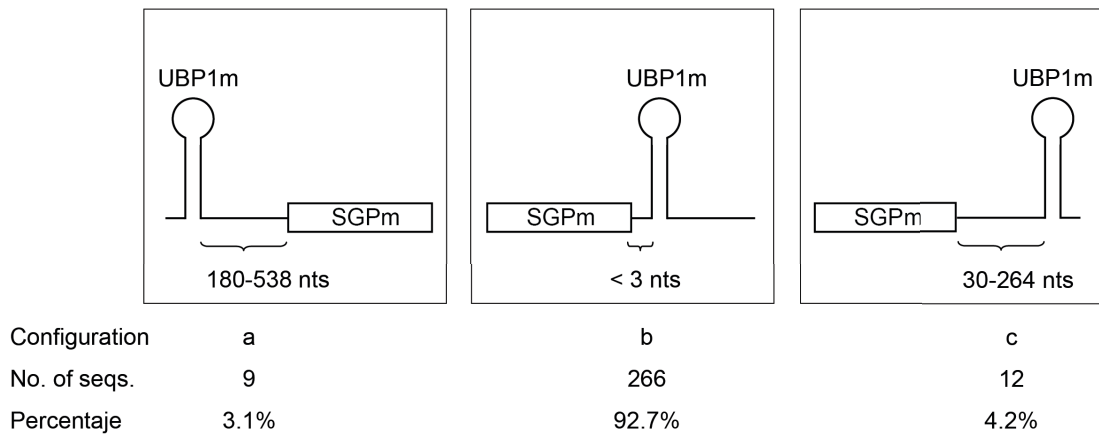

Figure S2. **Distribution of *cis*-elements.** Three alternative configurations (a, b and c) of distribution of UB1m and SGPm within 3'-UTRs.

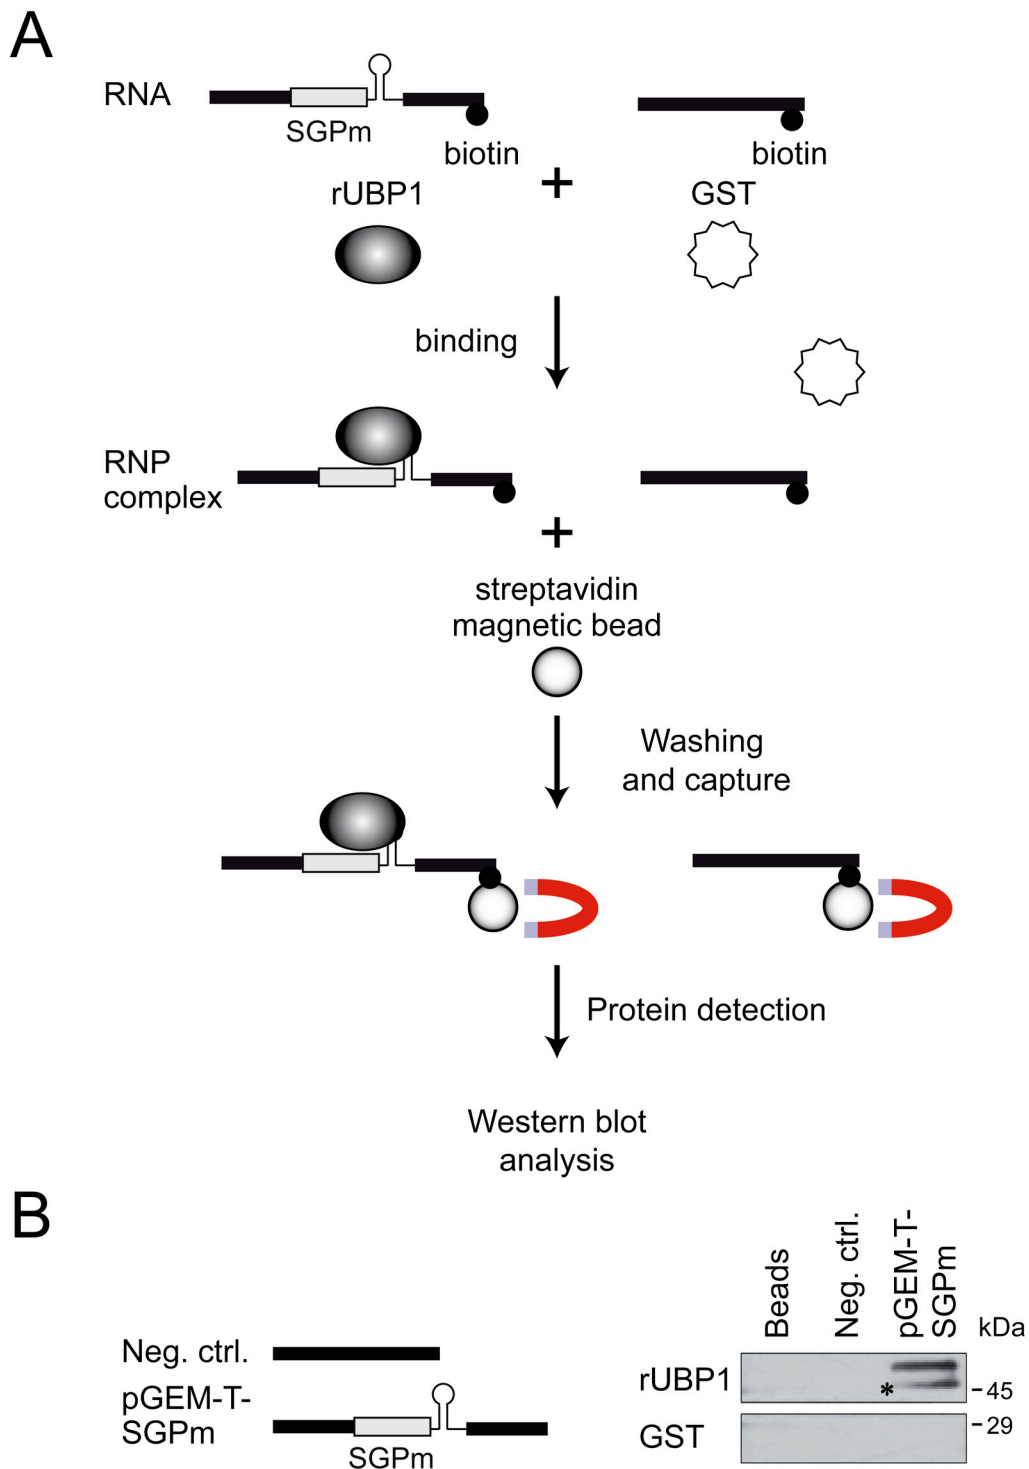

Figure S3. ***In vitro* RNA-binding assay.** *A*, Biotinylated transcripts containing (pGEM-T SGPm) or lacking SGPm (Neg. ctrl.) were incubated with recombinant proteins. The formed mRNP complex were pulled down using streptavidin-conjugated beads and the presence of the proteins detected by Western blot. *B*, Interaction of the GST-TcUBP1 (rUBP1) with a transcript bearing SGPm. The element SGP present in TSA-1 transcript was inserted into pGEM-T polylinker and transcribed *in vitro* using CTP-biotin (Invitrogen). As a control, the same construct lacking SGPm was used (Neg. ctrl.). GST or rUBP1 (25nM) were incubated with biotinylated transcripts and the presence of proteins in the recovered sample was revealed by Western blot. \*, degradation product of recombinant GST-TcUBP1.

**A***Immunoblot: anti-TcHSP70*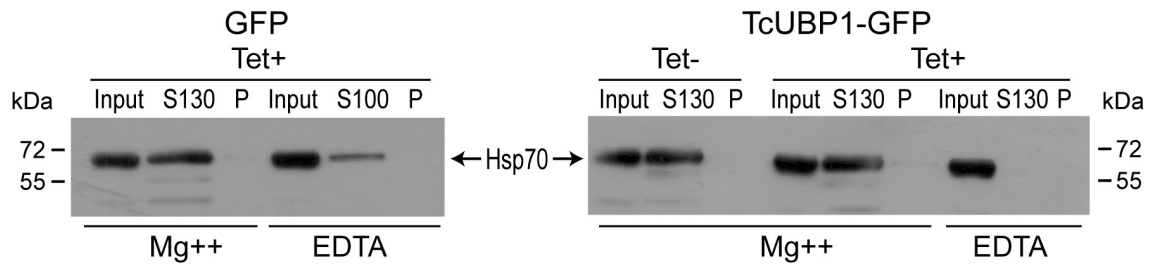**B***Immunoblot: anti-TcCruzipain*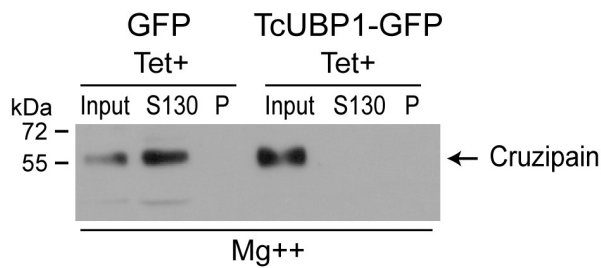

Figure S4. **Polysome purification (experiment controls).** Western blots analysis of cell extracts from GFP and TcUBP1-GFP samples, using induced (Tet<sup>+</sup>) control cultures. A clarified (S10) cytoplasmic extract from log-growth epimastigote *T. cruzi* culture, in the presence of magnesium (Mg<sup>++</sup>) or EDTA, was pelleted through a 30% sucrose cushion to separate prepolysome supernatant (S130) and polysomal pellet (P) fractions. Aliquots of S10, S130 and fivefold-concentrated aliquots of the P fraction were probed with serum. The position of the identified bands corresponding to TcHSP70 (A) and TcCruzipain (B) are noted by arrows. For TcUBP1-GFP, a non-induced (Tet<sup>-</sup>) sample in the presence of magnesium (Mg<sup>++</sup>) was also shown for the filter probed with anti-TcHSP70 antibody.

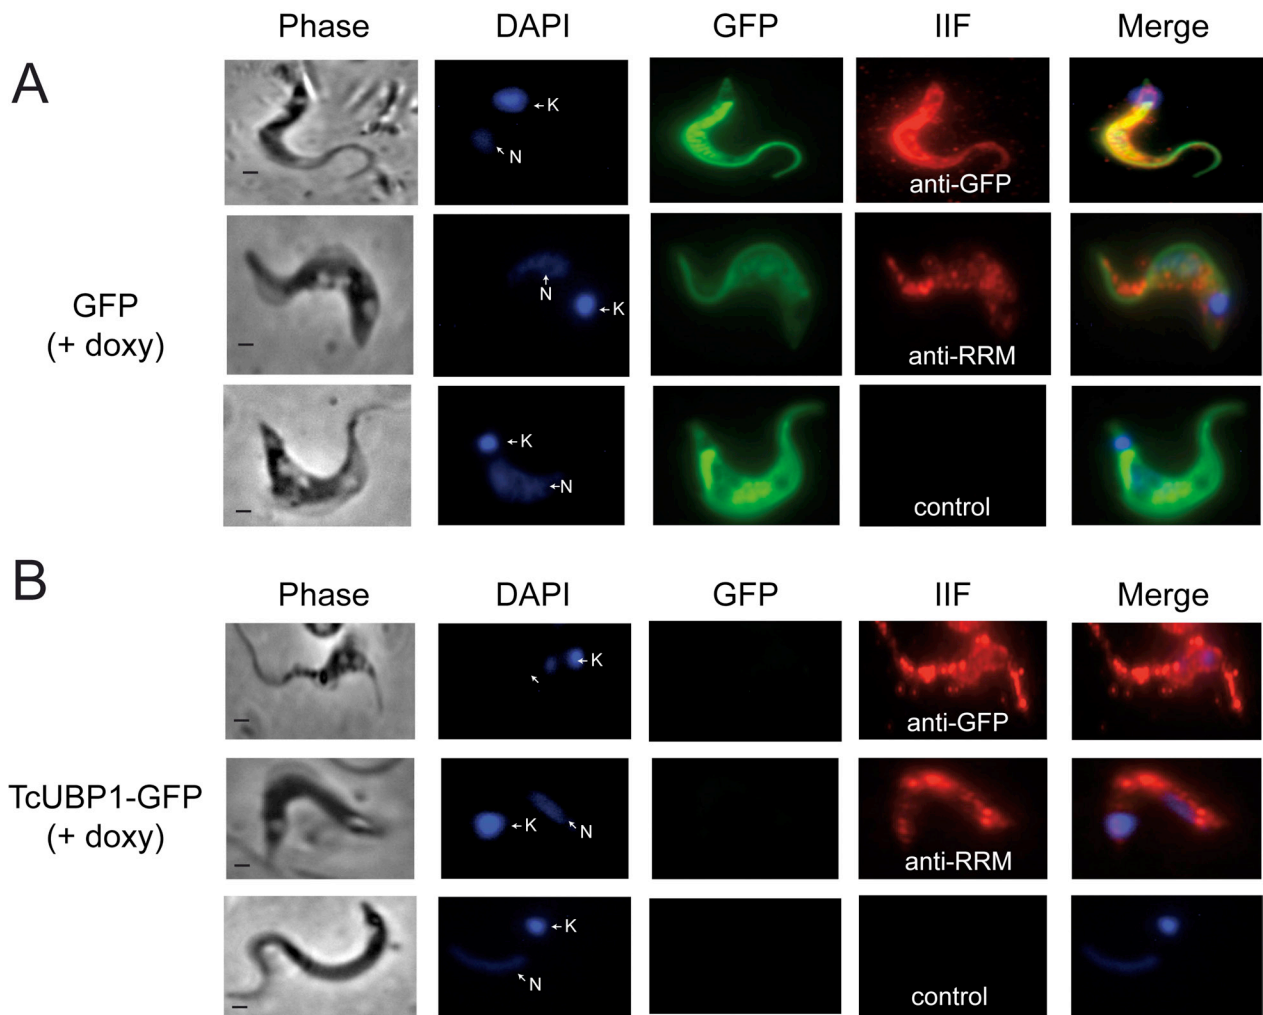

Figure S5. **Protein expression in transgenic trypanosomastigotes (induced samples).** Representative photographs of individual transgenic trypanosomastigotes with pTcINDEX-TcUBP1-GFP or pTcINDEX-GFP (induced with doxycycline), showing the fluorescence signals for TcUBP1 (anti-RRM) or GFP expression. DAPI staining of nuclear (N) and kinetoplast (K) DNA, with phase and merged images are also shown. Scale bars, 1  $\mu$ m.

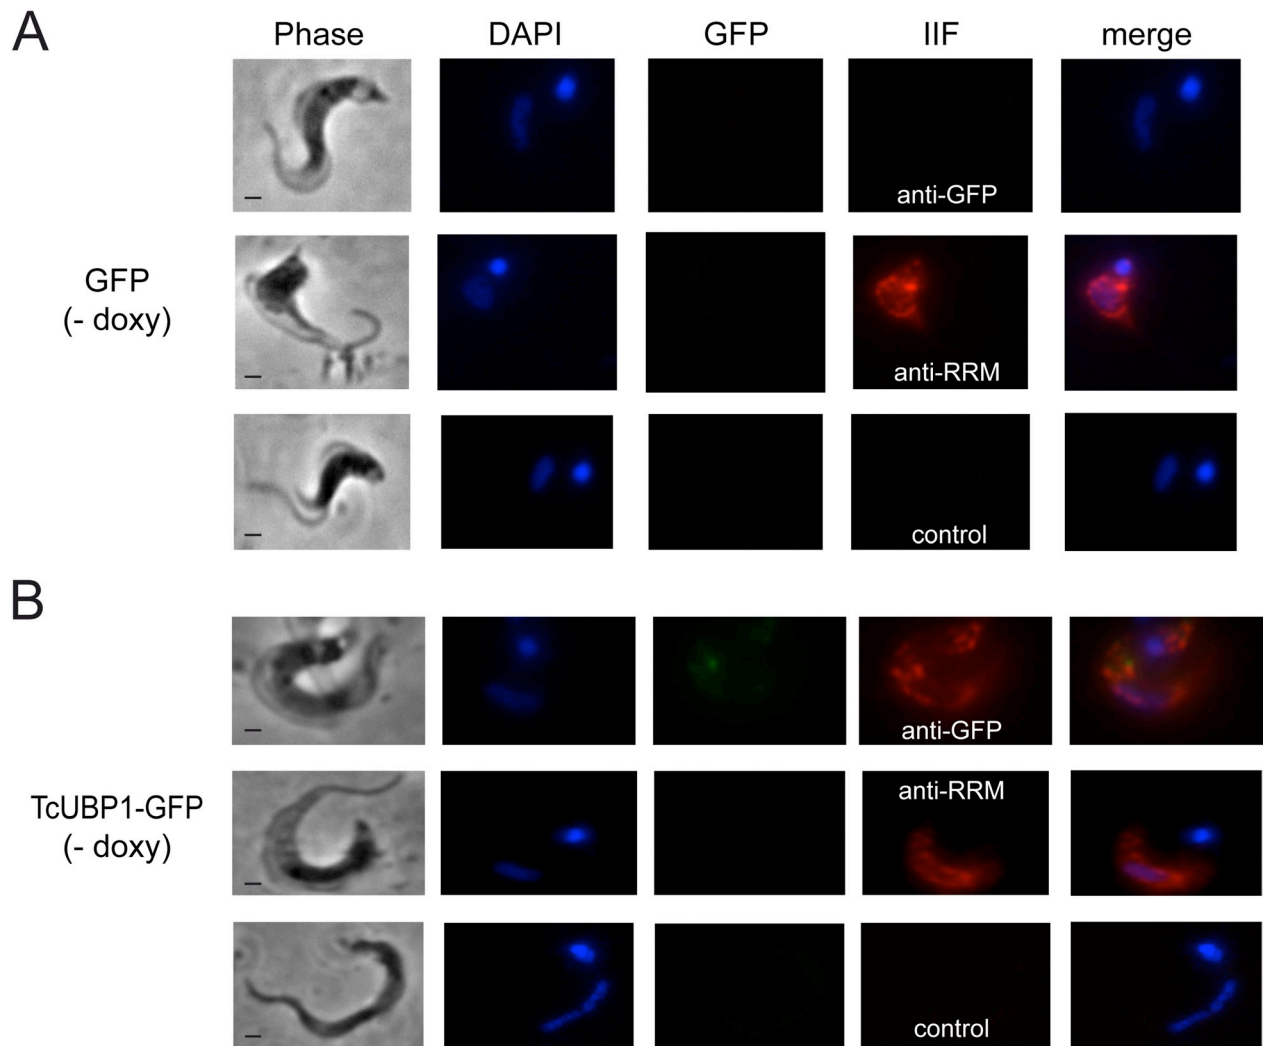

Figure S6. **Protein expression in transgenic trypanosomastigotes (non-induced controls).** Representative photographs of individual transgenic trypanosomastigotes with pTcINDEX-TcUBP1-GFP or pTcINDEX-GFP (without induction with doxycycline), showing the basal fluorescence signals for TcUBP1 (anti-RRM) or GFP expression. DAPI staining of nucleus (N) and kinetoplast (K), with phase and merged images are also shown. Scale bars, 1  $\mu$ m.

## SUPPLEMENTAL TABLES

### Supplemental Table S1

Number of SGP-containing genes clustered in the *T. cruzi* genome.

| Distance in a given chromosome (less than): | No. of Clusters | Total genes |
|---------------------------------------------|-----------------|-------------|
| 1 Kb                                        | 1               | 2           |
| 2 Kb                                        | 9               | 16          |
| 10 Kb                                       | 32              | ~60         |
| 100 Kb                                      | 145             | <290        |
| 1 Mb                                        | 191             | <380        |



**Supplemental Table S2**  
List of oligonucleotides used in this work.

| Experiment                  | Target                      | GeneID           | Name                   | Sequence (from 5' to 3') <sup>a</sup>                 |
|-----------------------------|-----------------------------|------------------|------------------------|-------------------------------------------------------|
| PCR                         | TSA-1                       | TcCLB.506471.120 | Fwd                    | <u>aagctt</u> GGGGCAACCACTATGAACT                     |
|                             |                             |                  | Rev                    | <u>ctcgag</u> CTTTCAACCGTCTGACCCTCC                   |
|                             | SGPm                        | -                | Fwd                    | <u>aagctt</u> TCCCGCCCAACTGCTCCACTC                   |
|                             |                             |                  | Rev                    | <u>gagctc</u> AAAAACACGGCGGCAGGGTG                    |
| qPCR                        | TSA-1                       | TcCLB.506471.120 | Fwd                    | TGGAACAGTAATAGAGGACAACCTTTT                           |
|                             |                             |                  | Rev                    | CAATTCCCTTTCATCATATATTAACCC                           |
|                             | C71                         | TcCLB.510163.60  | Fwd                    | TCTGCGTGGAGCACCTCAG                                   |
|                             |                             |                  | Rev                    | CGCATAGTAATCCACTACCAGGAGT                             |
|                             | SA85                        | TcCLB.508285.60  | Fwd                    | TTTGCGCCCTCTTCCACA                                    |
|                             |                             |                  | Rev                    | GCAAGGTGAACTTTGTTCCGA                                 |
|                             | GP85                        | TcCLB.506455.30  | Fwd                    | GGAGTGTGCGGCCCTCAGT                                   |
|                             |                             |                  | Rev                    | TTCCTAGCGGTGTGTGTGTGTGT                               |
|                             | SGPm                        | -                | Fwd                    | AACTGCTCCACTCGCACAC                                   |
|                             |                             |                  | Rev                    | CAGGGCCGTCGTCATGAG                                    |
|                             | TcSMUGL                     | TcCLB.504539.20  | Fwd                    | TGCAGCGGTGTGGACGTATAT                                 |
|                             |                             |                  | Rev                    | CGCAGAGAATGCACGGG                                     |
|                             | RpL6                        | TcCLB. 507709.50 | Fwd                    | GCACCCACCCACCAAAA                                     |
|                             |                             |                  | Rev                    | TCATGCGTTGCGTGTGTGT                                   |
|                             | 18S rRNA<br>(small subunit) | TcCLB.508653.20  | Fwd                    | CGGAATGGCACCACAAGAC                                   |
|                             |                             | Rev              | TGGTAAAGTTCCCGTGTGTA   |                                                       |
| 28S rRNA<br>(large subunit) | TcCLB.504153.50             | Fwd              | GTAGTATAGGTGGAAGCGCAAG |                                                       |
|                             |                             | Rev              | CCAGCTCACGTTCCCTGTCA   |                                                       |
| Luciferase                  | -                           | Fwd              | CGGATTACCAGGGATTTTCAG  |                                                       |
|                             |                             | Rev              | TCACGATCAAAGGACTCTGG   |                                                       |
| FISH                        | SGPm                        | -                | 5'Cy3                  | ACAGGGCCGTCGTCATGAGCGTGTCGG<br>TGGGTGTGCGAGTGAGCAGTTG |

<sup>a</sup>The restriction sites used for molecular cloning are indicated underlined in lowercase.

## SUPPLEMENTAL FILES

**Supplemental File 1.** Genes containing the 50-nt SGPm obtained from BLASTN searches.

**Supplemental File 2.** Genes containing both the SGPm and TcUBP1m.
